# Supplementary material
Source: publisher figshare collection journal article supplement (https://acs.figshare.com/ndownloader/files/18508658)

**Supporting Information for:**

**Quantification of dehydroepiandrosterone, 17 $\beta$ -estradiol,  
testosterone and their sulfates in mouse tissues by LC/MS/MS**

Hong Sik Yoo and Joseph L. Napoli\*

*Program in Metabolic Biology, Department of Nutritional Sciences and Toxicology, University  
of California, Berkeley, Berkeley, California 94720, United States*

\*Corresponding author: E-mail: jna@berkeley.edu;

Table S1. Sulfatase activity test. Four concentrations of DHEA-S in acetate buffer were hydrolyzed for 2 or 24 hr and extracted as described in Methods. AUC was converted into fmols using the DHEA calibration curve (Fig. 1C).

| DHEA-S<br>(pmol) | Acetate<br>buffer<br>(mL) | DHEA-S<br>(nM) | Incubation<br>time (hr) | AUC     | Est.<br>fmol | Injection<br>( $\mu$ L) | Reconstitution<br>( $\mu$ L) | pmol | recovery |
|------------------|---------------------------|----------------|-------------------------|---------|--------------|-------------------------|------------------------------|------|----------|
| 20               | 2                         | 10             | 2                       | 16,100  | 553          | 1                       | 40                           | 22   | 1.11     |
| 100              | 2                         | 50             | 2                       | 60,300  | 2,072        | 1                       | 40                           | 83   | 0.83     |
| 200              | 2                         | 100            | 2                       | 153,000 | 5,258        | 1                       | 40                           | 210  | 1.05     |
| 1000             | 2                         | 500            | 2                       | 645,000 | 22,165       | 1                       | 40                           | 887  | 0.89     |
| 20               | 2                         | 10             | 24                      | 12,800  | 440          | 1                       | 40                           | 18   | 0.88     |
| 100              | 2                         | 50             | 24                      | 69,000  | 2,371        | 1                       | 40                           | 95   | 0.95     |
| 200              | 2                         | 100            | 24                      | 147,000 | 5,052        | 1                       | 40                           | 202  | 1.01     |
| 1000             | 2                         | 500            | 24                      | 623,000 | 21,409       | 1                       | 40                           | 856  | 0.86     |

Figure S1. Amount-response curve for hydrolyzed DHEA-S.

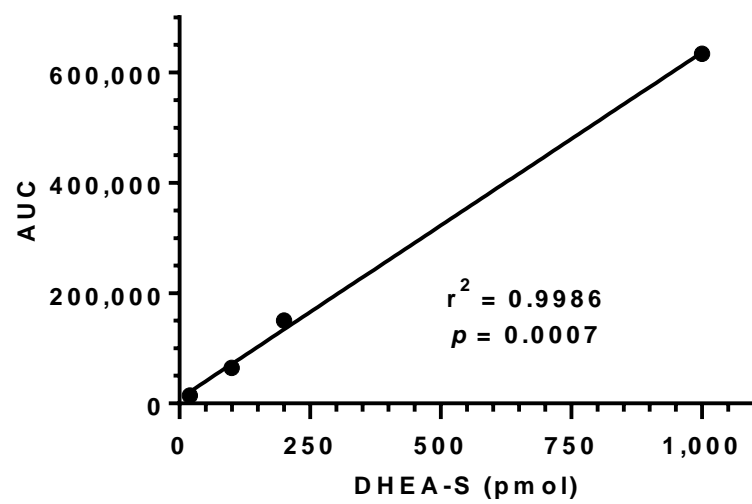

Figure S2. Correlation between free and conjugated levels of testosterone

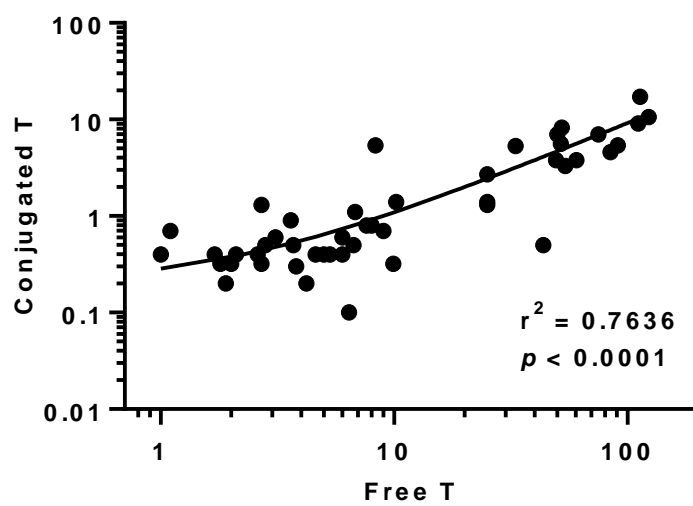

Supplement: Supplementary file 1 [file 18508658]
